# Supplementary material
Source: Springer Nature journal article supplement (https://www.springermedizin.de/resource/supplementary/12874_2012_872_MOESM2_ESM.pdf/9432674)

## Positive

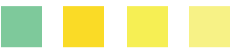

8 13 14 15

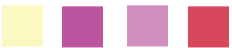

16 19 20 21

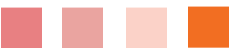

22 23 24 29

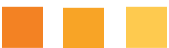

30 31 32

## Neutral

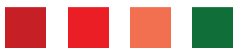

2 3 4 5

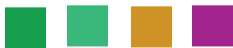

6 7 12 18

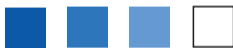

26 27 28 38

## Negative

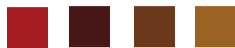

1 9 10 11

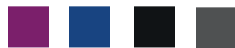

17 25 33 34

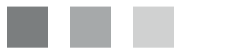

35 36 37

Supplement: MOESM2 [file 9432674]
